# Supplementary material for: Generation of a Single-Cell RNAseq Atlas of Murine Salivary Gland Development
Source: PubMed Central journal article supplement — iScience. 2020 Nov 20;23(12):101838. doi: 10.1016/j.isci.2020.101838 (PMC7718488; doi:10.1016/j.isci.2020.101838), 2020-11-20
Supplement: mmc1.pdf [file mmc1.pdf]

**iScience, Volume 23**

## **Supplemental Information**

### **Generation of a Single-Cell RNAseq**

### **Atlas of Murine Salivary Gland Development**

**Belinda R. Hauser, Marit H. Aure, Michael C. Kelly, Genomics and Computational Biology Core, Matthew P. Hoffman, and Alejandro M. Chibly**

# Supplementary Figure S1, related to figure 1

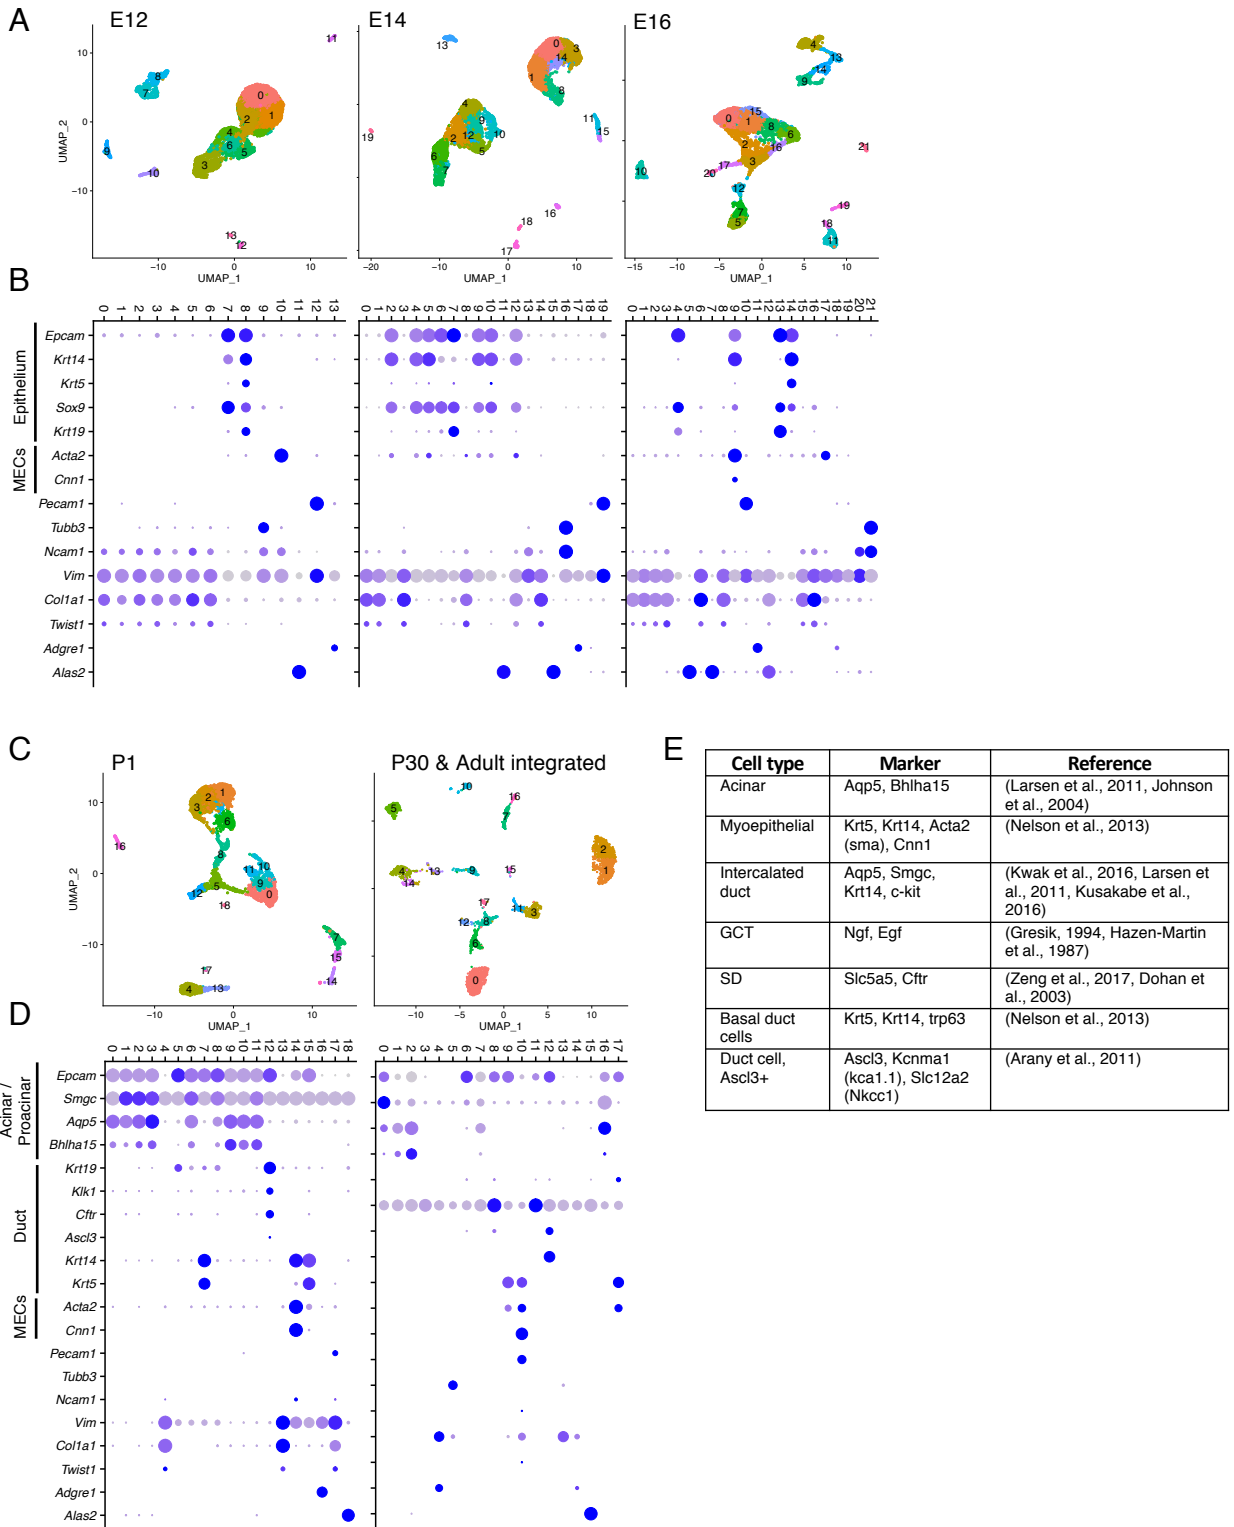

## Supplementary Figure 2. Annotation strategy.

Cell clustering was performed for individual developmental stages to annotate cell populations based on known cell markers prior to data integration.

A) UMAPs showing unsupervised clustering of scRNAseq from embryonic SMG.

B) Dot plot showing expression of markers used for annotation of embryonic SMG (MECs = myoepithelial cells).

C) UMAPs showing unsupervised clustering of scRNAseq from postnatal SMG.

D) Dot plot showing expression of markers used for annotation of postnatal SMG

E) Table with references to known epithelial markers for specific cell types in adult salivary glands.

Non-epithelial markers: *Pecam1*: Endothelial; *Tubb3*: Nerves; *Ncam1*: Nerves and Glial cells; *Vim*, *Col1a1* & *Twist1*: Mesenchymal and stromal cells; *Adgre1*: Macrophages; *Alas2*: Erythroid; *Acta2*: Myoepithelial and smooth muscle cells.

# Supplementary Figure S2, related to figure 2

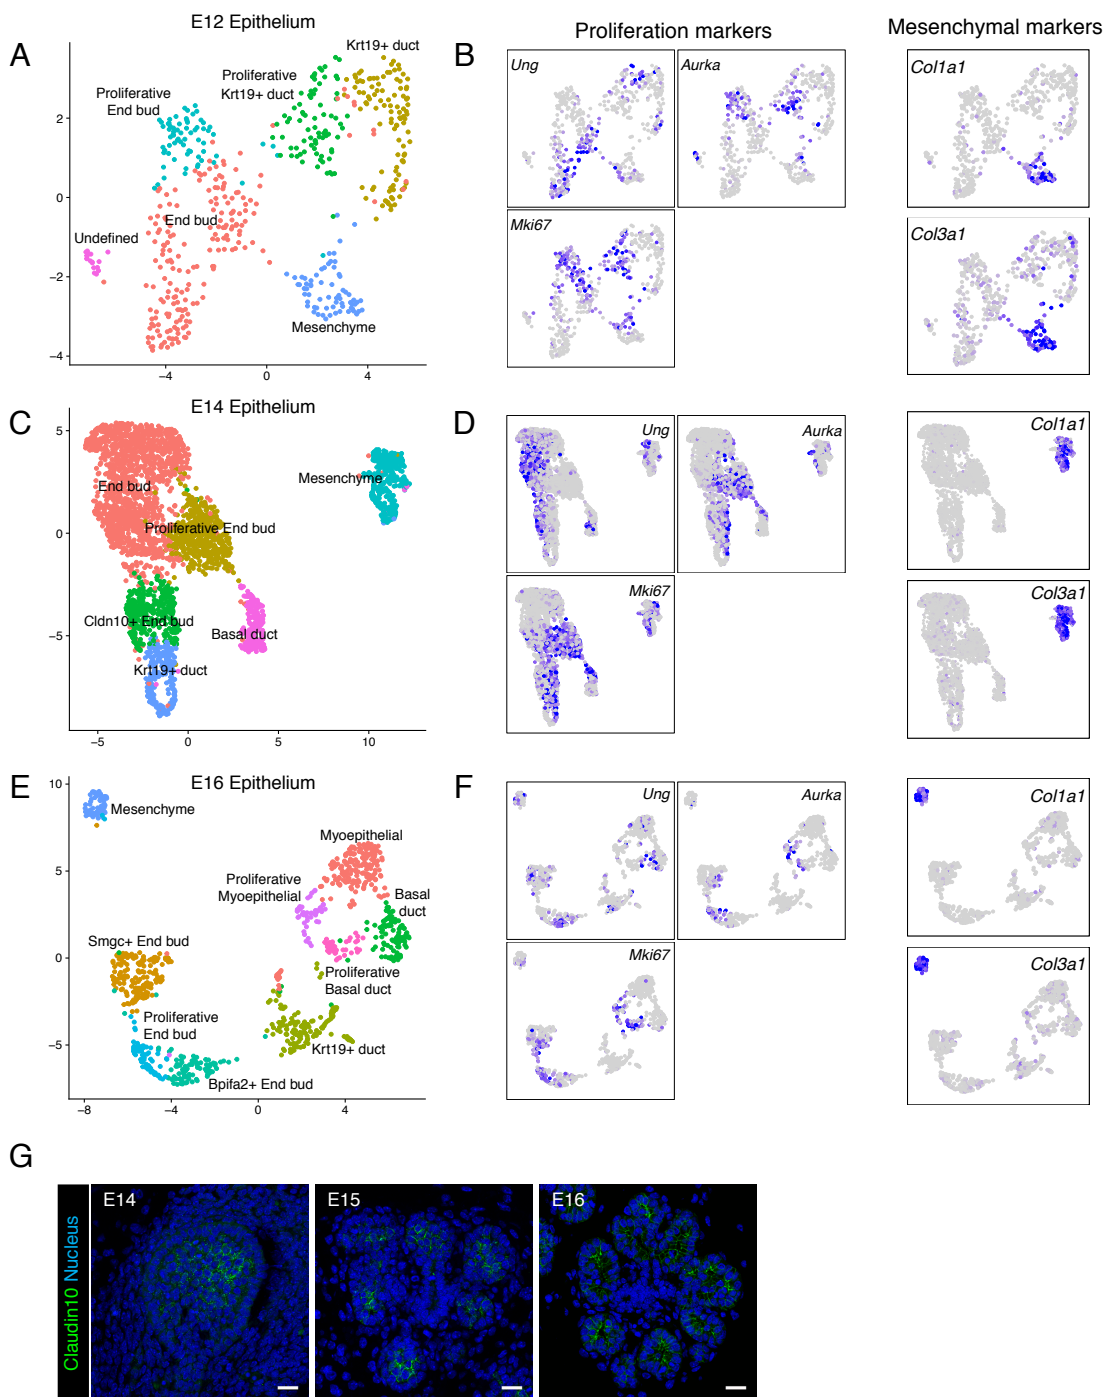

## Supplementary Figure 3: Proliferative epithelial subpopulations in embryonic SMG

- Annotated subpopulations in E12 SMG epithelium.
- UMAP showing subpopulations of proliferative and mesenchymal markers in E12 SMG epithelial cells.
- Annotated subpopulations in E14 SMG epithelium.
- UMAP showing subpopulations of proliferative and mesenchymal markers in E14 SMG epithelial cells.
- Annotated subpopulations in E16 SMG epithelium.
- UMAP showing subpopulations of proliferative and mesenchymal markers in E16 SMG epithelial cells.
- Immunostaining for claudin 10 (green) in embryonic SMG

# Supplementary Figure S3, related to figure 3

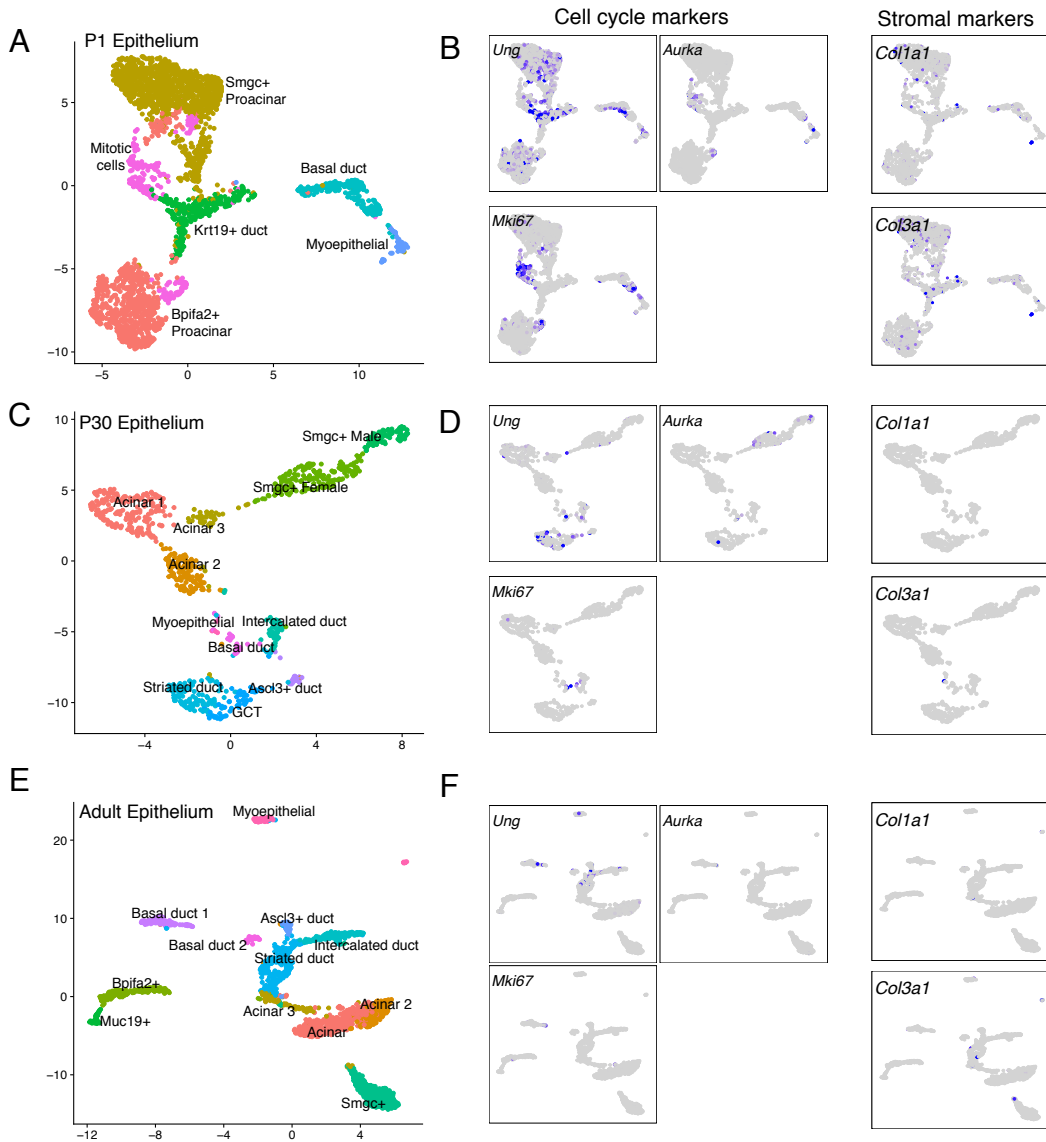

## Supplementary Figure 3: Proliferative epithelial subpopulations in postnatal SMG

- A) Annotated subpopulations in P1 SMG epithelium.
- B) UMAP showing subpopulations of proliferative and stromal markers in P1SMG epithelial cells.
- C) Annotated subpopulations in P30 SMG epithelium.
- D) UMAP showing subpopulations of proliferative and stromal markers in 30 SMG epithelial cells.
- E) Annotated subpopulations in Adult SMG epithelium.
- F) UMAP showing subpopulations of proliferative and stromal markers in Adult SMG epithelial cells.



# Figure S4, Related to Figure 5

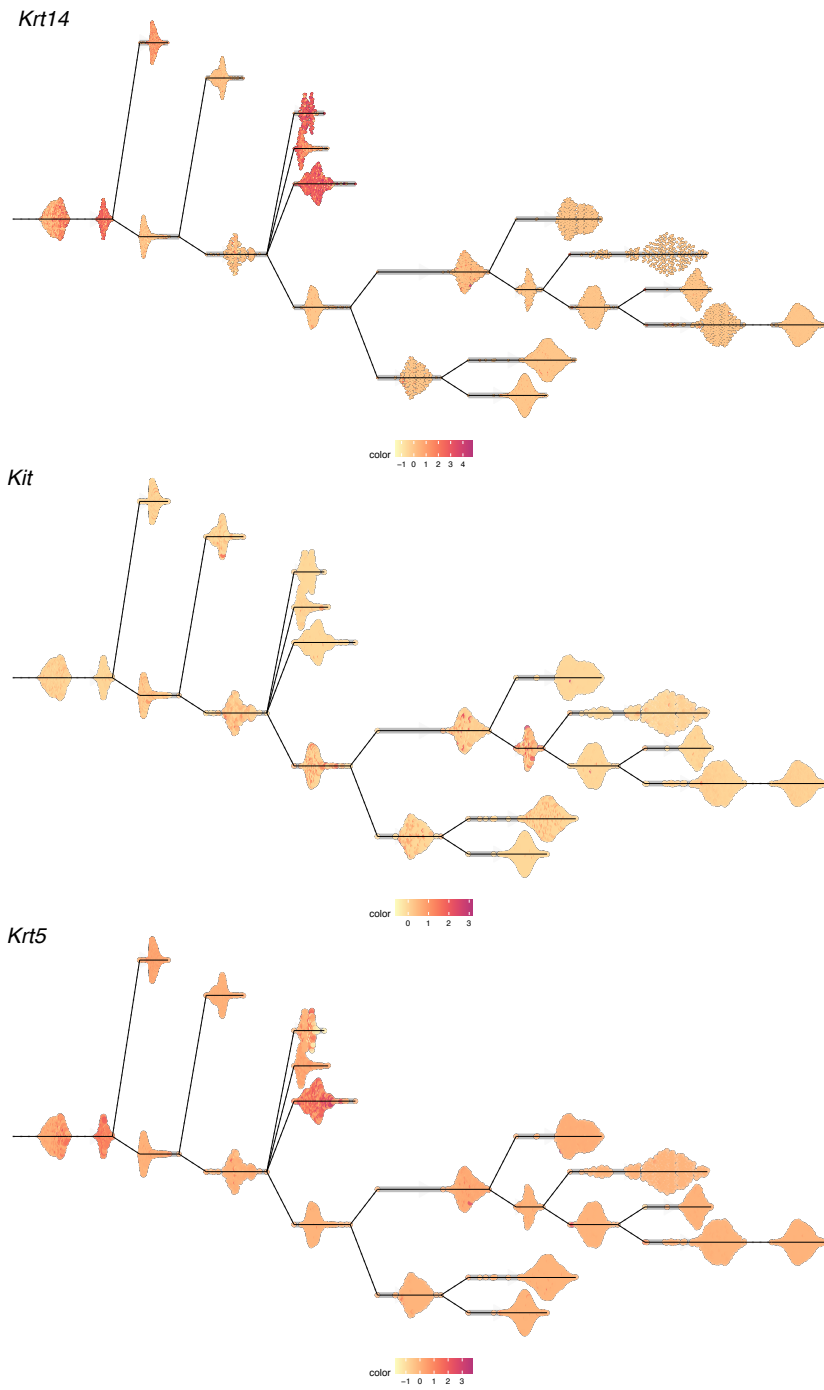

**Supplementary Figure S4.** Expression of *Krt14*, *Kit*, and *Krt5* along pseudotime trajectory. Intensity of color is relative to the scaled gene expression across all cells in the integrated dataset

# Supplementary Figure S5, related to figure 6

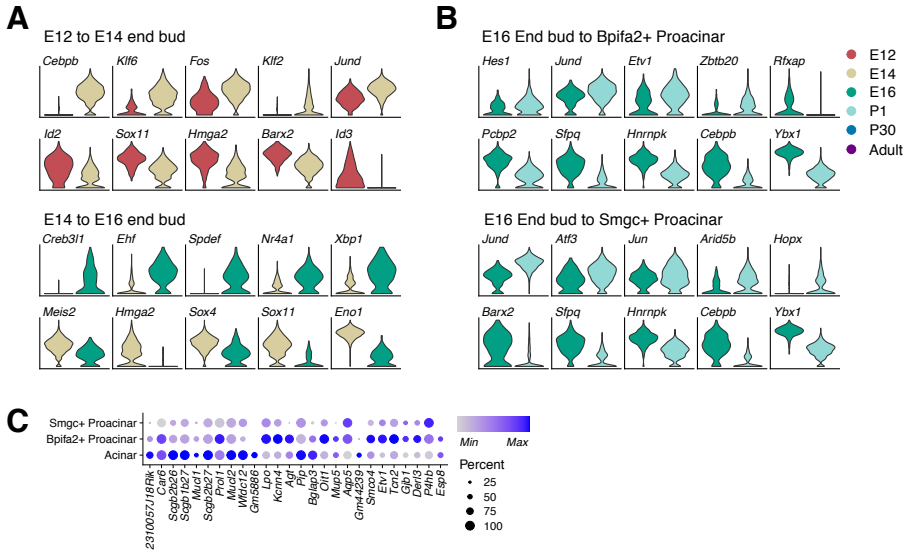

**Figure S6: Differential expression analysis of end bud populations during early embryonic development**

- A) Top transcription factors (TFs) differentially expressed in end buds from E12 to E14 (top panel), and E14 to E16 (bottom panel).
- B) Top TFs differentially expressed in the transition from end buds at E16 to proacinar cells at P1.
- C) Expression levels of the 26 defining genes for seromucous acinar cells from P30 SMG across acinar and proacinar cells. Gene list is associated with the Venn Diagram in Figure 6F. The size of the dot is relative to the percentage of cells expressing a gene, and the color scale is relative to the level of expression.

# Supplementary Figure S6. Related to Figure 8

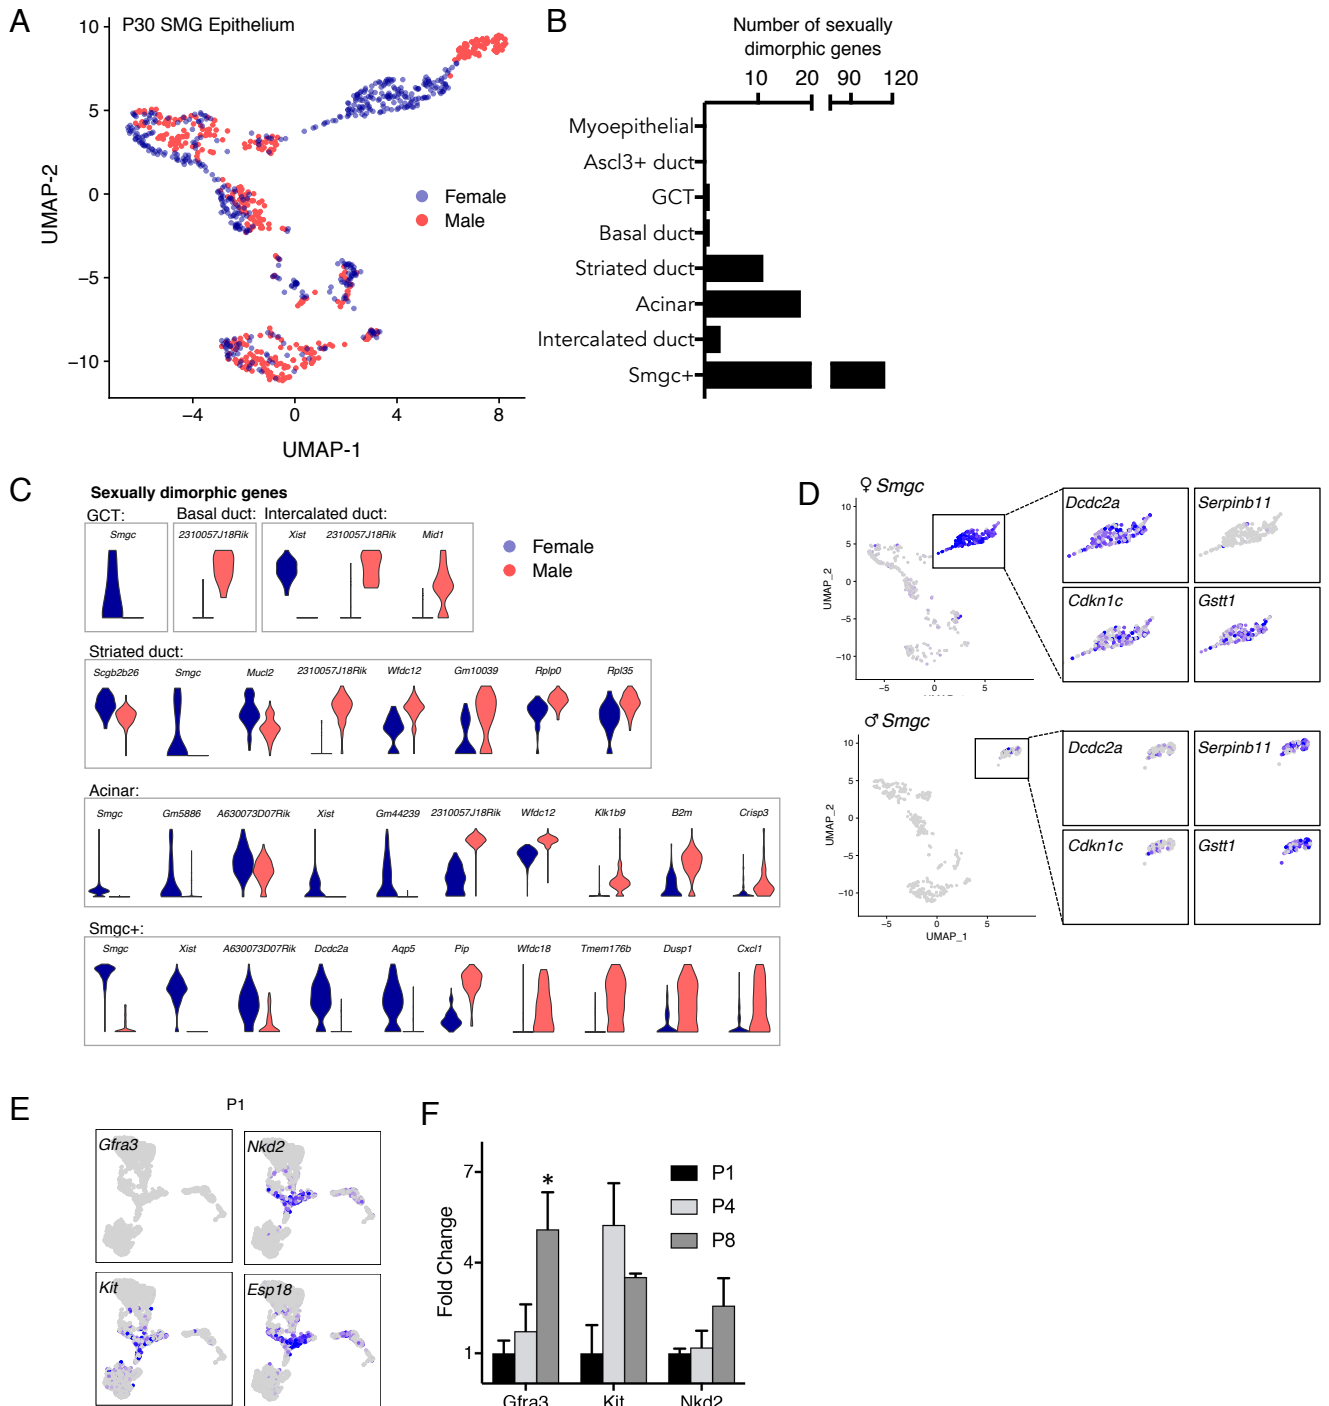

**Figure S4: Sexually dimorphic genes in P30 SMG**

A) UMAP of P30 SMG separated by sex.

B) Graph showing number of differentially expressed genes (DEGs) identified per cell type in female vs males.

C) Violin plots showing top 10 sexually dimorphic genes identified per cell type. All genes are shown for groups with less than 10 DEGs.

D) Representative female and male-specific genes in Smgc+ cells, as well as *Gstt1* which is common for both.

E) UMAP of expression of *Gfra3*+ID defining genes in P1 SMG

F) PCR results of *Gfra3*, *Kit*, and *Nkd2* expression in postnatal SMG normalized to P1 glands. Data are shown as the mean +/- SEM and asterisks represent statistical significance ( $p < 0.05$ ) compared to P1 SMG ( $n=3$ , two tailed t-test).

# Supplementary Figure S7. Related to Figure 8

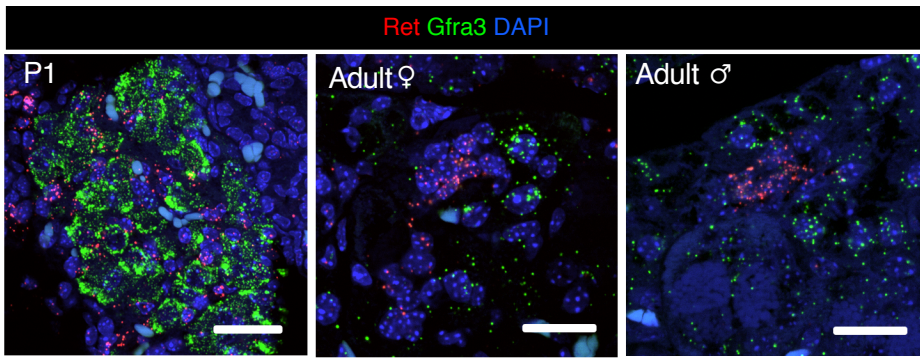

**Figure S7**

In situ hybridization of *Ret* (red) and *Gfra3* (green). At P1, these genes are co-expressed in ganglia. In the adult gland both male and females express *Gfra3* in ID, while *Ret* is found in acinar cells. All scale bars = 20 $\mu$ m.

# Supplementary Figure S8, related to Figure 9

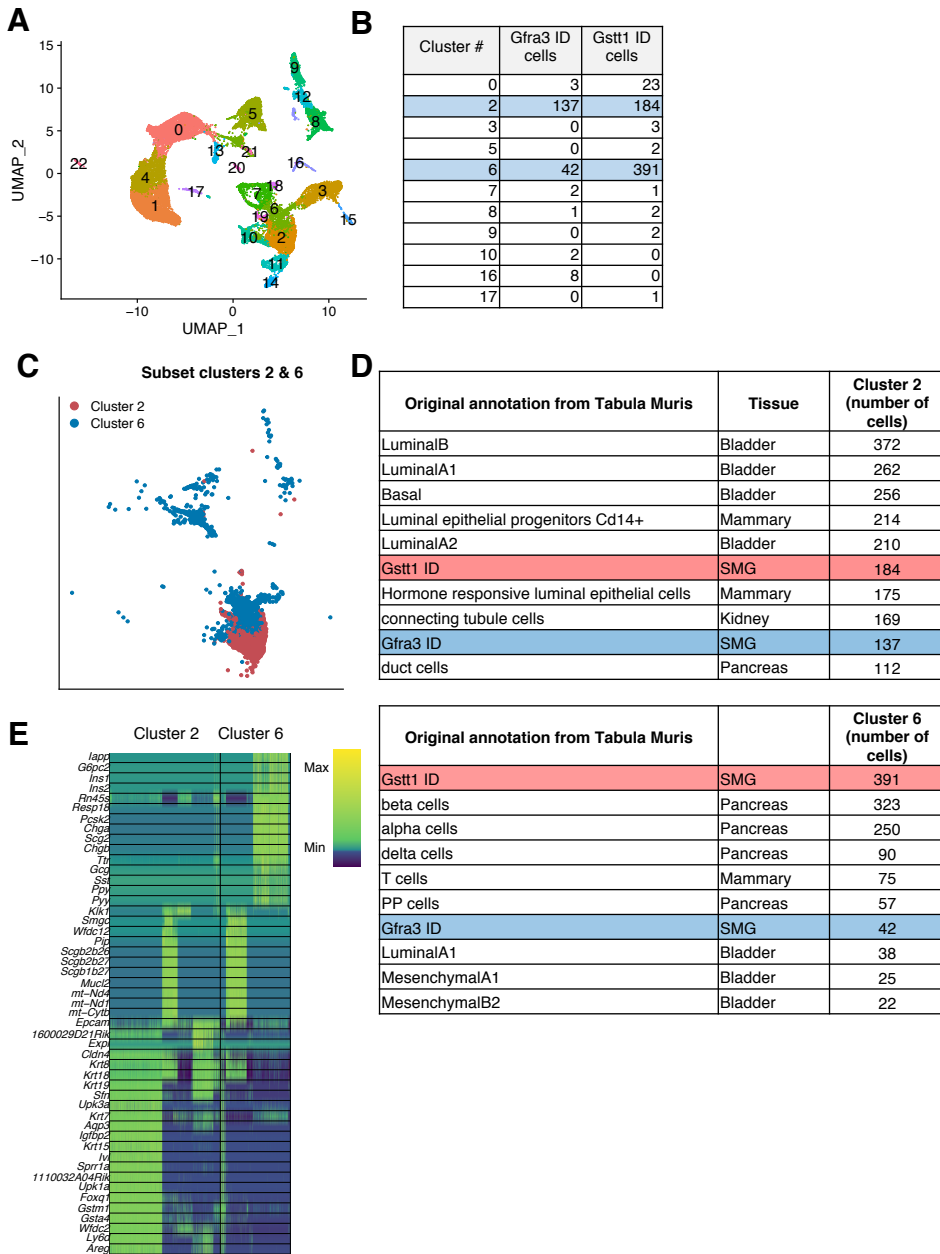

**Figure S8. Integration of ID cells with Tabula Muris data.**

- UMAP of unsupervised clustering after integration of ID cells with selected datasets from the Tabula Muris
- Table showing cluster localization of Gstt1+ and Gfra3+ ID cells. Clusters 2 and 6 contain most ID cells.
- UMAP of clusters 2 and 6
- Table showing the 10 most abundant cell types in clusters 2 and 6 based on original annotations from Tabula Muris
- Heatmap showing expression of the top 25 genes expressed by clusters 2 and 6 compared to all other clusters

## TRANSPARENT METHODS

### ICR mice

Timed-pregnant ICR females were purchased from Envigo at gestational day E9. From this point onwards mice were cared for and maintained at the NIDCR Veterinary Resource Core in accordance with institutional and IACUC guidelines. All mice were fed ad libitum and kept under 12-hour light/12-hour dark cycle. Pregnant females used for collection of mouse embryos were housed in pairs while those required for collection of P1 pups were individually housed to prevent overcrowding. Mouse embryos were collected from ICR pregnant females at embryonic days E12, E14, and E16, and newborn pups were collected at P1. Additional 30-day old (P30) male and female ICR mice were purchased from Envigo for experimentation.

### C3H mice

Adult (10-month old) C3H female mice were obtained from Jay Chiorini's laboratory at NIDCR. Prior to experimentation, these mice were also housed and kept at the NIDCR Veterinary Resource Core in accordance with IACUC guidelines. These mice were used for experimentation upon receipt and were not maintained by our laboratory.

**Single-cell Dissociation.** SMGs from seven E12 and E14 littermate embryos were separated, isolated and incubated at 37°C for 30 min with 500ul of papain (20U/ml in 1mM L-cysteine with 0.5mM EDTA (Worthington biochemical, New Jersey, USA) in 200ul Eppendorf tubes. Glands were dissociated with a pipette in 5-minute intervals. After 30 min, Papain was inactivated with (1:1) albumin-inhibitor solution (Worthington biochemical, New Jersey, USA) and the cell suspension was collected by centrifugation at 400g at 4°C for 10 min, washed twice and resuspended in Hanks balanced salt solution (HBSS 1x, Gibco, USA) with 1% Bovine serum albumin solution (BSA, Sigma-Aldrich).

SMGs from 2-4 E16 embryos and P1 mice were isolated and enzymatically dissociated in 5ml of digestion cocktail containing Collagenase II (100mg/ml), Hyaluronidase (50mg/ml), deoxyribonuclease (40mg/ml), and neutral protease (50mg/ml) in HBSS-BSA. Dissociation was performed in a 15ml gentleMACS C tube using a miltenyi gentleMACS Octo Dissociator following their preset dissociation program A (24 seconds of clockwise-counterclockwise spin cycles) followed by 30 min incubation at 37°C. Dissociated cells were centrifuged (400xg) for 10 min and resuspended in HBSSA-BSA. Then, cells were passed through 100  $\mu$ m, 40  $\mu$ m, and 20  $\mu$ m filters centrifuging (400xg) for 5 min and resuspending in HBSS-BSA after each filtration step. The final cell suspension was centrifuged (400xg) 5 min and treated with Papain as described above.

For P30 ICR and adult C3H mice, glands were dissociated in a 15ml gentleMACS C tube with 5ml of digestion cocktail prepared with the human tumor dissociation kit (#130-095-929, Miltenyi Biotech, Auburn CA) in RPMI 1640 w/L-Glutamine (Cell applications, Inc, USA). 2 SMGs from male and female ICR mice, and 2 SMG from adult female C3H mice were processed individually. Similar to previous dissociations, digestion was performed in a Miltenyi gentleMACS Octo Dissociator but following the preset 37C\_h\_TDK\_2 program. We added 5ml of RPMI media to the dissociated cells and centrifuged (400xg) for 10 min. Cells were resuspended in RPMI 1640 w/L-Glutamine with 5% PenStrep (Gibco, USA) and washed twice with RPMI. Next, cells were centrifuged (400g) for 5 min and washed with RPMI medium before each filtration step through 70  $\mu$ m and 40  $\mu$ m filters. Apart from the enzymatic digestion, all

steps were performed on ice. Single-cell dissociation was confirmed by microscopic examination and cell concentration determined with a Cellometer (Nexcelom Biosciences). Cell concentration was adjusted to  $5 \times 10^5 - 1 \times 10^6$  cells/ml prior to analysis with a 10X genomics Next GEM Chromium controller.

**Library prep and sequencing:** Single-cell RNA-seq library preparation was performed at the NIDCR Genomics and Computational Biology Core using a Chromium Single Cell v3 method (10X Genomics) following the manufacturer's protocol. Pooled single-cell RNA-seq libraries were sequenced on a NextSeq500 sequencer (Illumina). Cell Ranger Single-Cell Software Suite (10X Genomics) was used for demultiplexing, barcode assignment, and unique molecular identifier (UMI) quantification using the mm10 reference genome (Genome Reference Consortium Mouse Build 38) for read alignment.

**Computational analysis:** Cell Ranger files were imported to SEURAT v3 using R & R Studio software and processed for clustering following their default pipeline. As a quality control measure, cells with fewer than 200 genes were not included in subsequent analyses, and those with >5% of UMIs mapping to mitochondrial genes were defined as non-viable or apoptotic and were also excluded. A threshold of >10% was used for P30 and adult glands because inherently higher percentage of mitochondrial genes was detected in specific duct populations, and the 5% threshold would therefore filter out these specific cells disproportionately. A similar approach has been recommended for human tissues because a threshold of 5% fails to accurately discriminate between low-quality and healthy cells in ~30% of the evaluated tissues (Osorio and Cai, 2020). Normalization and scaling were performed following SEURAT's default pipeline. All developmental stages were processed individually except for P30 and adult glands, which were integrated prior to assigning cell annotations. The optimal number of PCs for clustering was determined for each individual file using the 'ElbowPlot' function. Cell type labels were assigned based on the expression of known cell type markers summarized in supplementary figure S1. After cell type annotations, data integration with SEURAT was performed for embryonic stages and postnatal stages separately to generate the UMAPs in Figure 1 for visualization only. Data integration of all datasets was used for trajectory inference analysis (Figure 5) with Dynverse (Saelens et al., 2019) and PAGA (Wolf et al., 2019) packages, and for differential expression across developmental stages with SEURAT (Figures 6-7).

**Computational separation and analysis of epithelial clusters:** Epithelial populations were computationally separated from the previously annotated datasets containing cell type labels using SEURAT's subset function. Epithelial subsets from each stage were re-normalized and scaled to generate new SEURAT objects. Cluster-defining genes were determined using the 'FindAllMarkers' function for unsupervised epithelial clusters.

**Trajectory inference analysis:** Data integration was performed for all annotated epithelial subsets with SEURAT. This function automatically determined the 2000 most variable genes used as anchors for the analysis. The resulting gene expression matrix and the genes used for integration were then used as input for trajectory analysis with Dynverse. Based on Dynverse guidelines, trajectory inference analysis was performed with the Partition-based graph abstraction (PAGA) algorithm, which determines a pseudotime score and trajectory topology starting from a selected cell population. Because E12 salivary progenitors give rise to the entire salivary epithelium in the adult, E12 epithelial cells were manually selected as the 'root' of the inferred trajectory.

**Bhlha15-correlation analysis:** End bud, proacinar, and acinar populations were separated from the integrated SEURAT file to extract a gene expression matrix for these populations. Correlation to Bhlha15 gene expression was performed using the 'cor.test' function in R. The resulting correlation scores and p-values are provided in Supplementary File 3 and the top 10 positive and negative correlations were plotted using the 'corrplot' package.

**Analysis of developmental transitions:** Differential expression between specific populations from the integrated file containing epithelial cells from all stages was performed using the SEURAT 'FindMarkers' function. In order to identify transcription factors, we cross-referenced the resulting differentially expressed genes against a database of mouse transcription factors (Schmeier *et al*, 2017). Only the top 5 transcription factors (if present) are shown in violin plots using an adjusted p value <0.05 as a measure of significance. The complete list of identified markers is provided in Supplementary File 4.

**Immunohistochemistry:** Isolated glands were fixed in 4% paraformaldehyde overnight at 4°C. The tissue was dehydrated with gradient ethanol (2 hours for each dehydration step) and placed in 70% Ethanol until the day of standard paraffin embedding. 5µm sections were deparaffinized with xylene substitute for 10 minutes and rehydrated with reverse ethanol gradient for 5 minutes each. Tissue sections were washed twice in each ethanol concentration (90, 70, and 50%) and then placed in distilled water for 10 min. Following rehydration, heat induced antigen retrieval was done in a pressure cooker for 20 min using a pH 9.0 Tris-EDTA homemade prepared with Tris Base (1.21g), EDTA (0.37g) in 100mL of distilled water. Sections were washed for 5 minutes with homemade 0.1% PBS-Tween (PBST) using 1XPBS (Quality Biological, Gaithersburg, MD) and Tween20 (Quality Biological, Inc). Non-specific binding sites were blocked using the M.O.M.® (Mouse on Mouse) Immunodetection Kit (Vector Laboratories, Burlingame, CA) for 1 hour at room temperature followed by overnight incubation at 4°C with primary antibodies. Tissue sections were washed 3 times for 5 minutes each with PBST and incubated in secondary antibodies at room temperature for 45 min. Nuclear staining was done with Hoechst (Thermo Fisher Scientific, Marietta, OH) and coverslips were mounted with Fluoro-Gel (Electron Microscopy Sciences, Hatfield, PA). A complete list of antibodies used and their respective dilutions is shown in the Key Resource Table associated with this manuscript.

**Wholemount staining:** SMGs from E12, E14, and E16 mouse embryos were dissected and fixed with 1:1 Acetone-Methanol at -20°C for 10 minutes. After fixation, glands were washed with 1XPBS and blocked with M.O.M kit for an hour at room temperature. Incubation in primary antibody was performed overnight at 4°C followed by a 1-hour incubation in secondary antibody at room temperature. Glands were mounted on standard microscopy glass slides with Fluoro Gel mounting media. A complete list of antibodies used and their respective dilutions is shown in the Key Resource Table associated with this manuscript.

**qRT-PCR:** Gene expression of selected markers was measured by qRT-PCR. DNase-free RNA was isolated from whole gland SMG lysates from P20, P30, and P90 male and female ICR mice using the RNAqueous-4PCR kit and DNase removal reagent (Ambion, Inc. Austin, TX). cDNA (20ng) was generated and analyzed by qPCR using SuperScript™ III First-Strand Synthesis System (ThermoFisher Scientific). Melt curve analysis was used to verify the generation of a single amplicon. Expression levels were normalized by the delta-delta Ct method to the housekeeping gene *Rsp29* and aged-matched female glands. Four biological replicates for each group were processed in duplicates except when otherwise specified. Primers were designed using Beacon Designer software and sequences are available in Supplementary File 8.



**RNAprobes:** Adult p30 and p1, freshly dissected tissue and collected in 200ul eppendorf tubewas and then washed in 1x PBS RNase free solution. All tools were cleaned with 70% ethanol and wiped before use. All tissue must be preserved in RNase free solution. Freshly prepared tissue was placed in 4% PFA for no longer 36hrs and sent to ACD with for RNA in situ hybridization with respective probes. Sample were also accompanied by dehydration pockets to remove moisture from prepared slides and slide were immediately placed in 4°C prior to imaging. Specific probe sequences are proprietary and generated with RNAscope® technology by Advanced Cell Diagnostics.

### **Quantification and statistical analysis**

For computational analyses with SEURAT, all statistics were performed using their pipeline's default statistical test, which is based on non-parametric Wilcoxon rank sum test. Adjusted p-values of <0.05 were chosen as a measure of significance. Correlation analysis was performed using the 'cor.test' function, which uses Pearson's method for significance. For statistical analysis of qRT-PCR data, log-transformed fold changes were compared between male glands and age-matched female samples using a two-tailed unpaired t-test for each gene individually.

## KEY RESOURCES TABLE

| REAGENT or RESOURCE                                                                   |        | SOURCE                              | IDENTIFIER  |
|---------------------------------------------------------------------------------------|--------|-------------------------------------|-------------|
| <b>Antibodies</b>                                                                     |        |                                     |             |
| AQP5                                                                                  | 1:200  | Alomone labs                        | AQP-005     |
| Cytokeratin-5                                                                         | 1:200  | Covance                             | PRB-160P    |
| Cytokeratin-14                                                                        | 1:200  | Covance                             | PRB-155P    |
| GFR alpha-3/GDNF R alpha-3                                                            | 1:80   | R&D systems                         | AF2645      |
| GSTT1                                                                                 | 1:200  | Lifespan Bioscience                 | LS-B10781   |
| Epcam                                                                                 | 1:200  | Abcam                               | Ab71916     |
| NKCC1                                                                                 | 1:200  | Santa Cruz Biotechnology            | sc-21547    |
| Vimetin                                                                               | 1:200  | Abcam                               | Ab8978      |
| Smgc                                                                                  | 1:100  | Lifespan Bioscience                 | LS-C154825  |
| Mist1                                                                                 | 1:200  | Cell signaling                      | 14896       |
| Mist1                                                                                 | 1:100  | Santa Cruz Biotechnology            | sc-80984    |
| PSP/Bpifa2                                                                            | 1:100  | Lifespan Bioscience                 | LS-B9833    |
| Lpo                                                                                   | 1:100  | Thermo Fischer Scientific           | PA1-46353   |
| Claudin10                                                                             | 1:200  | Thermo Fischer Scientific           | 38-8400     |
| Alexa Fluor® 488 AffiniPure F(ab') <sub>2</sub> Fragment Donkey Anti-Goat IgG (H+L)   | 1:250  | Jackson Immunoresearch Laboratories | 705-546-147 |
| Alexa Fluor® 647 AffiniPure F(ab') <sub>2</sub> Fragment Donkey Anti-Goat IgG (H+L)   | 1:250  | Jackson Immunoresearch Laboratories | 705-606-147 |
| Alexa Fluor® 488 AffiniPure F(ab') <sub>2</sub> Fragment Donkey Anti-Rabbit IgG (H+L) | 1:250  | Jackson Immunoresearch Laboratories | 711-546-152 |
| Cy™3 AffiniPure F(ab') <sub>2</sub> Fragment Donkey Anti-Rabbit IgG (H+L)             | 1:250  | Jackson Immunoresearch Laboratories | 711-166-152 |
| Cy™3 AffiniPure F(ab') <sub>2</sub> Fragment Donkey Anti-Mouse IgG (H+L)              | 1:250  | Jackson Immunoresearch Laboratories | 715-165-150 |
| Hoechst 33342                                                                         | 1:1000 | Thermo Fisher Scientific            | H3570       |
| <b>Oligonucleotides – Sequences provided in Supplementary File 8</b>                  |        |                                     |             |
| <i>Smgc</i>                                                                           |        | Life Technologies                   | N/A         |
| <i>Dcdc2a</i>                                                                         |        | Life Technologies                   | N/A         |
| <i>Serp1b11</i>                                                                       |        | Life Technologies                   | N/A         |
| <i>Gstt1</i>                                                                          |        | Life Technologies                   | N/A         |
| <i>Kit</i>                                                                            |        | Life Technologies                   | N/A         |
| <i>Gfra3</i>                                                                          |        | Life Technologies                   | N/A         |
| <i>Esp18</i>                                                                          |        | Life Technologies                   | N/A         |
| <i>Nkd2</i>                                                                           |        | Life Technologies                   | N/A         |
| <i>Rs29</i>                                                                           |        | Life Technologies                   | N/A         |
| RNA probe for Aqp5                                                                    |        | ACDBio                              | N/A         |
| RNA probe for Esp18                                                                   |        | ACDBio                              | N/A         |
| RNA probe for Gfra3                                                                   |        | ACDBio                              | N/A         |
| RNA probe for Nkd2                                                                    |        | ACDBio                              | N/A         |
| RNA probe for Prol1                                                                   |        | ACDBio                              | N/A         |
| RNA probe for Ret                                                                     |        | ACDBio                              | N/A         |

| <b>Chemicals, Peptides, and Recombinant Proteins</b>                        |                                                         |              |
|-----------------------------------------------------------------------------|---------------------------------------------------------|--------------|
| Hanks balanced salt solution (HBSS) no calcium, no magnesium, no phenol red | Gibco/ Life technologies                                | 14175-103    |
| PBS 1X                                                                      | Quality Biological, Inc                                 | 114-058-101  |
| Tween 20                                                                    | Quality Biological, Inc                                 | A611-M147-13 |
| Fluoro-Gel with TRIS mounting media                                         | Electron Microscopy Sciences                            | 1798510      |
| Bovine serum albumin solution (BSA)                                         | Sigma Aldrich                                           | A9205        |
| 16% Paraformaldehyde (formaldehyde) Aqueous solution                        | Electron Microscopy Sciences                            | 15700        |
| Xylene substitute                                                           | Sigma Aldrich                                           | A5597-1GAL   |
| Ethanol 100%                                                                | Sigma Aldrich                                           | E7023        |
| Ethanol 95%                                                                 | Sigma Aldrich                                           | 493538       |
| Acetone                                                                     | Sigma Aldrich                                           | 179973       |
| Methanol                                                                    | ThermoFisher                                            | A412-4       |
| Tris Base                                                                   | Millipore Sigma                                         | 648310-M     |
| EDTA                                                                        | Millipore Sigma                                         | E1161        |
| RPMI 1640                                                                   | Cell application                                        | 185-500      |
| Neutral Protease                                                            | Worthington Biochemical Corp                            | LS02109      |
| Deoxyribonuclease I                                                         | Worthington Biochemical Corp                            | LS002145     |
| Hyaluronidase                                                               | Worthington Biochemical Corp                            | LS002594     |
| Collagenase, Type 2                                                         | Worthington Biochemical Corp                            | LS00476      |
| <b>Critical Commercial Assays</b>                                           |                                                         |              |
| Human tumor dissociation kit                                                | Miltenyi Biotech                                        | 130-095-929  |
| M.O.M (Mouse on Mouse) Immunodetection Kit                                  | Vector Laboratories                                     | BMK-2202,    |
| Superscript III First-Strand Synthesis System                               | Life Technologies                                       | 18080051     |
| Papain Dissociation system                                                  | Worthington Biochemical                                 | LK003150     |
|                                                                             |                                                         |              |
| <b>Deposited Data</b>                                                       |                                                         |              |
| scRNAseq of murine SMG at multiple developmental stages                     | This paper                                              | GSE15032     |
|                                                                             |                                                         |              |
| <b>Experimental Models: Organisms/Strains</b>                               |                                                         |              |
| Timed-pregnant ICR Female Mice                                              | Envigo                                                  | ICR (CD-1®)  |
| ICR postnatal mice                                                          | Envigo                                                  | ICR (CD-1®)  |
| C3H adult female mice                                                       | From Jay Chiorini's lab                                 | N/A          |
|                                                                             |                                                         |              |
| <b>Software and Algorithms</b>                                              |                                                         |              |
| R & R studio                                                                | <a href="https://rstudio.com/">https://rstudio.com/</a> | N/A          |
| Cell Ranger                                                                 | 10X Genomics                                            | N/A          |
| SEURAT                                                                      | Stuart, Butler <i>et al</i> (2019)                      | N/A          |
| Dynverse                                                                    | Saelens <i>et al</i> (2019)                             | N/A          |
| PAGA                                                                        | Wolf A <i>et al</i> (2019)                              | N/A          |
|                                                                             |                                                         |              |
| <b>Other</b>                                                                |                                                         |              |
| MACS SMART Strainers 70µm                                                   | Miltenyi Biotech                                        | 130-110-916  |

## Supplementary references

- Arany, s., catalan, m. A., roztocil, e. & ovitt, c. E. 2011. Ascl3 knockout and cell ablation models reveal complexity of salivary gland maintenance and regeneration. *Dev Biol*, 353, 186-93.
- Dohan, o., de la vieja, a., paroder, v., riedel, c., artani, m., reed, m., ginter, c. S. & carrasco, n. 2003. The sodium/iodide symporter (nis): characterization, regulation, and medical significance. *Endocr rev*, 24, 48-77.
- Hazen-martin, d. J., landreth, g. & simson, j. A. 1987. Immunocytochemical localization of nerve growth factor in mouse salivary glands. *Histochem j*, 19, 210-6.
- Johnson, c. L., kowalik, a. S., rajakumar, n. & pin, c. L. 2004. Mist1 is necessary for the establishment of granule organization in serous exocrine cells of the gastrointestinal tract. *Mech dev*, 121, 261-72.
- Larsen, h. S., aure, m. H., peters, s. B., larsen, m., messelt, e. B. & kanli galtung, h. 2011. Localization of aqp5 during development of the mouse submandibular salivary gland. *J mol histol*, 42, 71-81.
- Schmeier S., Alam, T., Essack M., and Bajic V., 2017. TcoF-DB v2: update of the database of human and mouse transcription co-factors and transcription factor interactions. *Nuc Ac Res*, 45, D145-150.
- Zeng, m., szymczak, m., ahuja, m., zheng, c., yin, h., swaim, w., chiorini, j. A., bridges, r. J. & muallem, s. 2017. Restoration of cftr activity in ducts rescues acinar cell function and reduces inflammation in pancreatic and salivary glands of mice. *Gastroenterology*, 153, 1148-1159.
